# Supplementary material for: Energetics of native defects in anatase TiO2: a hybrid density functional study
Source: Royal Society of Chemistry journal article supplement (doi:10.1039/c6cp05798e), 2016-01-01
Supplement: c6cp05798e1.pdf [file c6cp05798e1.pdf]

Electronic Supplementary Material (ESI) for Physical Chemistry Chemical Physics (PCCP).  
This journal is © The Royal Society of Chemistry 2016

## Energetics of native defects in anatase $\text{TiO}_2$ : A hybrid density functional study

Adisak Boonchun, Pakpoom Reunchan and Naoto Umezawa

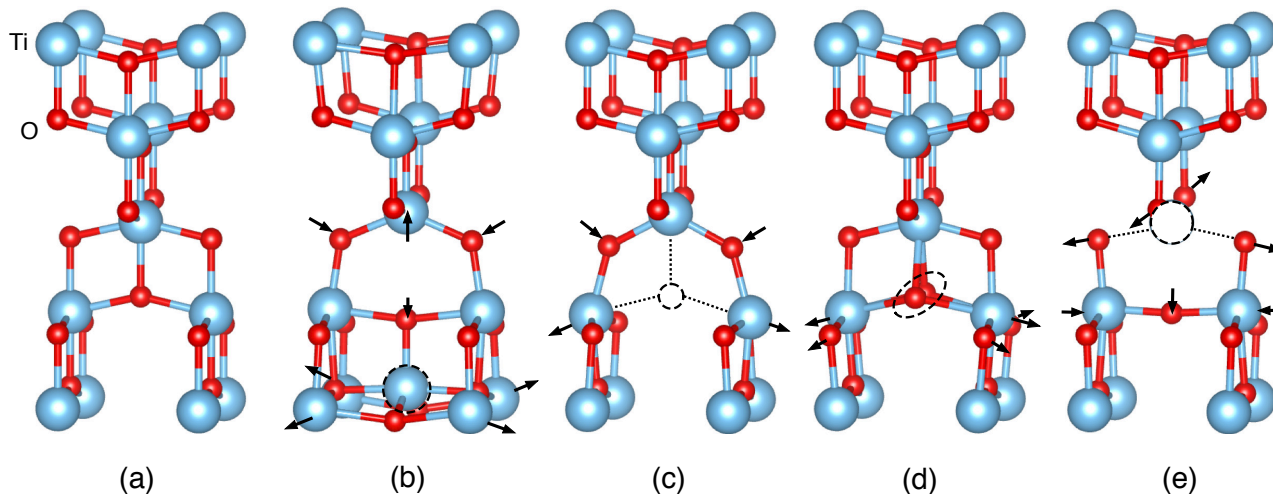

**Figure S1** The optimized atomic structure of (a) bulk (b)  $\text{Ti}_i^{4+}$  (c)  $V_O^2$  (d)  $O_{i,db}$  and (e)  $V_{Ti}^{4-}$  defect. The large gray spheres are Ti atoms and the small red spheres are the O atoms. Relaxation around neighboring defect atoms are indicated by the arrows.

In Equation 3, the thermodynamic transition levels which the formation energy of the two charge states are equal can be derived as following equation:

$$E_f(D^q) = E_{tot}(D^q) - E_{tot}(\text{TiO}_2) - n_i\mu_i + q(\varepsilon_F + E_V) \quad (1)$$

$$E_f(D^{q'}) = E_{tot}(D^{q'}) - E_{tot}(\text{TiO}_2) - n_i\mu_i + q'(\varepsilon_F + E_V). \quad (2)$$

The formation energy of the two charge states are equal;

$$E_f(D^q) - E_f(D^{q'}) = 0 \quad (3)$$

Then,

$$E_f(D^{q'}; \varepsilon_F = 0) - E_f(D^q; \varepsilon_F = 0) + (q - q')\varepsilon_F = 0 \quad (4)$$

Finally,

$$\varepsilon(q/q') = \frac{E_f(D^{q'}; \varepsilon_F = 0) - E_f(D^q; \varepsilon_F = 0)}{q' - q}, \quad (5)$$

where

$$E_f(D^q; \varepsilon_F = 0) = E_{tot}(D^q) - E_{tot}(\text{TiO}_2) - n_i\mu_i + qE_V$$
